# Supplementary material for: A Transformation and Genome Editing System for Cassava Cultivar SC8
Source: MDPI journal article supplement (doi:10.3390/genes13091650), 2022-09-14
Supplement: s1 [file s1]

## Supplementary Figures and Tables

### 1. Supplementary Figures

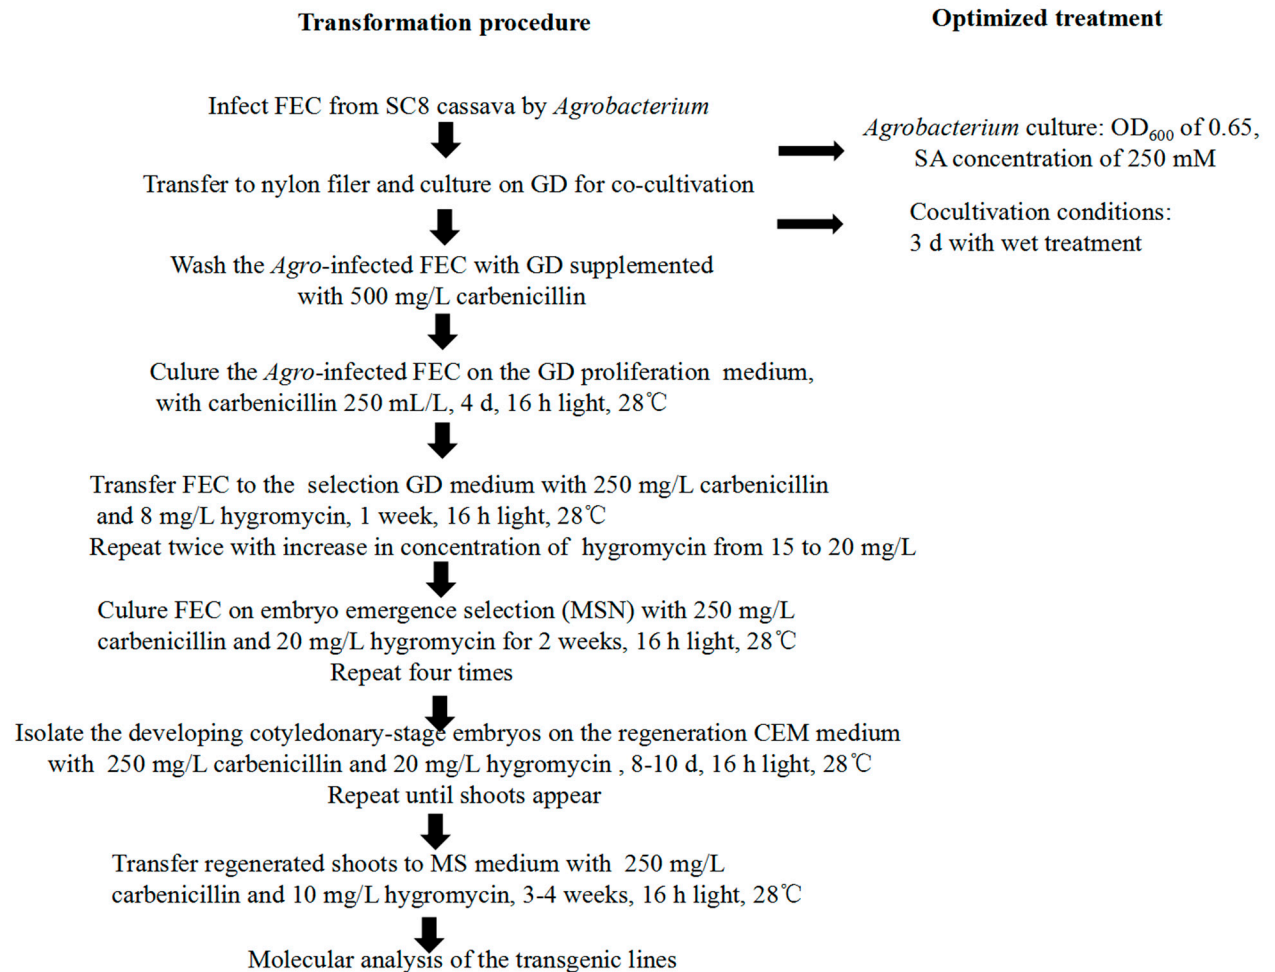

**Supplementary Figure S1.** Schematic workflow of the protocol for *Agrobacterium*-mediated transformation of cassava cultivar SC8. The flow chart shows the essential steps optimized and followed in the protocol.

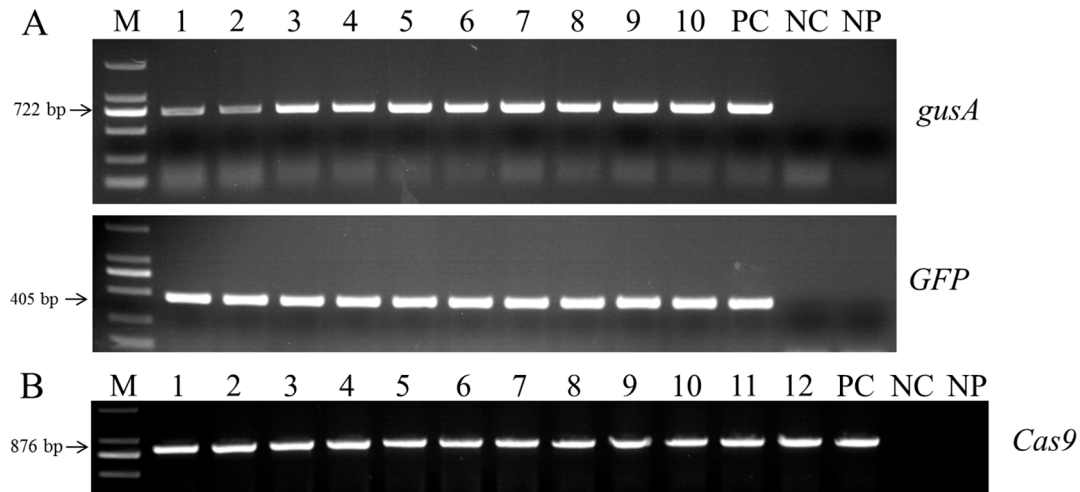

**Supplementary Figure S2. Molecular analysis of transgenic plants.** (A) PCR analysis of transgenic lines of cassava using *gusA* and *GFP* gene specific primers. Lanes M: 2000 bp marker (TAKARA), Lanes 1-10: different transgenic lines, PC: Positive control, NC: Negative control, NP: No template PCR. (B) PCR analysis of CRISPR/Cas9 T-DNA integration. Lanes M: 2000 bp marker (TAKARA), Lanes 1-12: different transgenic lines, PC: Positive control, NC: Negative control, NP: No template PCR.

## 2. Supplementary Tables

**Supplementary Table S1. The media and their compositions**

| Medium | Compositions (1 L)                                                                  |
|--------|-------------------------------------------------------------------------------------|
| MS     | 4.4 g MS, 30 g sucrose, 0.32 mg CuSO <sub>4</sub> , pH5.8, 8 g Agar                 |
| GD     | 2.75 g GD, 20 g sucrose, 12 mg picloram, pH5.8, 8 g Agar                            |
| CIM    | 4.4 g MS, 20 g sucrose, 0.32 mg CuSO <sub>4</sub> , 12 mg picloram, pH5.8, 8 g Agar |
| CEM    | 4.4 g MS, 30 g sucrose, 0.32 mg CuSO <sub>4</sub> , 0.4 mg 6-BA, pH5.8, 8 g Agar    |
| COM    | 4.4 g MS, 30 g sucrose, 0.32 mg CuSO <sub>4</sub> , 1 mg 6-BA, pH5.8, 8 g Agar      |
| MSN    | 4.4 g MS, 20 g sucrose, 0.32 mg CuSO <sub>4</sub> , 1 mg NAA, pH5.8, 8 g Agar       |

All the above culture media need to be autoclaved at 121°C for 20 min.

**Supplementary Table S2. Primers used in this study.**

| Primer name | Primer sequence               | length | Aims                                   |
|-------------|-------------------------------|--------|----------------------------------------|
| MePDS-F:    | 5'-AGCTGGGGACTACACAAAGC-3'    | 210 bp | Amplification of the <i>MePDS</i> part |
| MePDS-R:    | 5'-CCACACCCATTAGGCCTTGTA-3'   |        |                                        |
| GFP-F:      | 5'-CAAGGACGACGGCAACTACA-3'    | 405 bp | Amplification of the <i>GFP</i> part   |
| GFP-R:      | 5'-TCGTCCATGCCGAGAGTGAT-3'    |        |                                        |
| GUS-F:      | 5'-CCTCGCATTACCCTTACGCT-3'    | 722 bp | Amplification of the <i>GUSA</i> part  |
| GUS-R:      | 5'-TTTCTTGTTACCGCCAACGC-3'    |        |                                        |
| CAS9-F:     | 5'-GCAAGCTGCTCTAGCCAATACGC-3' | 876 bp | Amplification of                       |

|              |                                              |        |                                |
|--------------|----------------------------------------------|--------|--------------------------------|
| CAS9-R:      | 5'-CGGGAAACGACAATCTGATCCAAG-3'               |        | the Cas9 part                  |
| MePDS-gRNA-F | 5'-gattGCGTACAAAGCTTCCCAGAT-3'               | 28 bp  | <i>MePDS</i> gene target       |
| MePDS-gRNA-R | 5'-aaacATCTGGGAAGCTTTGTACGC-3'               |        |                                |
| MePDS-HT-F:  | 5'-ggagtgagtacggtgtgcAGCTGGGGACTACACAAAGC-3' | 246 bp | <i>MePDS</i> gene editing test |
| MePDS-HT-R:  | 5'-gagttggatgctggtggCCACACCCATTAGGCCTTGTA-3' |        |                                |

Note: the lowercase letters represent the linker sequences.

**Supplementary Table S3. Results of *MePDS* gene by Hi-TOM analysis**

| Lines | Sequence near the target                       | Reads | Ratio  | Variation type | Variation sequence |
|-------|------------------------------------------------|-------|--------|----------------|--------------------|
| WT    | GT <b>CCT</b> ATCTGGGAAGCTTTGTACGCAG           | 10974 | 96.26% |                |                    |
| L1    | GT <b>CCT</b> ATCT <b>T</b> GGGAAGCTTTGTACGCAG | 766   | 90.22% | 1I             | T                  |
|       | GT <b>CCT</b> ATCTGGGAAGCTTTGTACGCAG           | 83    | 9.78%  | WT             |                    |
| L2    | GT <b>CCT</b> ATCT <b>T</b> GGGAAGCTTTGTACGCAG | 6636  | 93.62% | 1I             | T                  |
| L3    | GT <b>CCT</b> ATCTGGGAAGCTTTGTACGCAG           | 6588  | 55.67% | WT             |                    |
|       | GT <b>CCT</b> ATCT <b>T</b> GGGAAGCTTTGTACGCAG | 5100  | 43.09% | 1I             | T                  |
| L4    | GT <b>CCT</b> ATCT <b>T</b> GGGAAGCTTTGTACGCAG | 14197 | 96.76% | 1I             | T                  |
| L5    | GT <b>CCT</b> ATCT <b>T</b> GGGAAGCTTTGTACGCAG | 13236 | 97.92% | 1I             | T                  |
| L6    | GT <b>CCT</b> ATCT <b>T</b> GGGAAGCTTTGTACGCAG | 24680 | 84.58% | 1I             | T                  |
|       | GT <b>CCT</b> ATCT <b>T</b> GGGAAGCTTTGTACGCAG | 1489  | 5.10%  | 1I,SNP         | T,A->G             |
| L7    | GT <b>CCT</b> AT-----GTACGCAG                  | 11295 | 53.29% | 12D            | CTGGGAAGCTTT       |
|       | GT <b>CCT</b> ATC---GGAAGCTTTGTACGCAG          | 8993  | 42.43% | 2D             | TG                 |
| L8    | GT <b>CCT</b> ATCT <b>T</b> GGGAAGCTTTGTACGCAG | 14194 | 96.76% | 1I             | T                  |
| L9    | GT <b>CCT</b> ATCT <b>T</b> GGGAAGCTTTGTACGCAG | 12625 | 98.36% | 1I             | T                  |
| L10   | GT <b>CCT</b> ATCT <b>T</b> GGGAAGCTTTGTACGCAG | 19092 | 94.53% | 1I             | T                  |
| L11   | GT <b>CCT</b> AT-----GTACGCAG                  | 13658 | 52.02% | 12D            | CTGGGAAGCTTT       |
|       | GT <b>CCT</b> ATC---GGAAGCTTTGTACGCAG          | 11569 | 44.07% | 2D             | TG                 |
| L12   | GT <b>CCT</b> ATCT <b>T</b> GGGAAGCTTTGTACGCAG | 11196 | 50.68% | 1I             | T                  |
|       | GT <b>CCT</b> ATC-----TTTGTACGCAG              | 5433  | 24.59% | 8D             | TGGGAAGC           |
| L13   | GT <b>CCT</b> ATC-----GCTTTGTACGCAG            | 5138  | 23.26% | 6D             | TGGGAA             |
|       | GT <b>CCT</b> ATCT <b>T</b> GGGAAGCTTTGTACGCAG | 31334 | 77.67% | 1I             | T                  |
| L14   | GT <b>CCT</b> ATCT <b>T</b> GGGAAGCTTTGTACGCAG | 2770  | 6.87%  | 1I,SNP         | T,A->G             |
|       | GT <b>CCT</b> AT-----GTACGCAG                  | 185   | 29.60% | 12D            | CTGGGAAGCTTT       |
| L15   | GT <b>CCT</b> ATCT <b>T</b> GGGAAGCTTTGTACGCAG | 183   | 29.28% | 1I             | T                  |
|       | GT <b>CCT</b> ATC---GGAAGCTTTGTACGCAG          | 174   | 27.84% | 2D             | TG                 |
| L16   | GT <b>CCT</b> ATCTGGGAAGCTTTGTACGCAG           | 83    | 13.28% | WT             |                    |
|       | GT <b>CCT</b> ATCT <b>T</b> GGGAAGCTTTGTACGCAG | 6786  | 96.57% | 1I             | T                  |
| L17   | GT <b>CCT</b> ATCT <b>T</b> GGGAAGCTTTGTACGCAG | 495   | 82.91% | 1I             | T                  |
|       | GT <b>CCT</b> ATCTGGGAAGCTTTGTACGCAG           | 102   | 17.09% | WT             |                    |
| L18   | GT <b>CCT</b> ATCT <b>T</b> GGGAAGCTTTGTACGCAG | 142   | 62.01% | 1I             | T                  |
|       | GT <b>CCT</b> ATCTGGGAAGCTTTGTACGCAG           | 87    | 37.99% | WT             |                    |

|     |                                       |       |        |        |              |
|-----|---------------------------------------|-------|--------|--------|--------------|
| L18 | GT <u>CCT</u> AT-----GTACGCAG         | 14009 | 53.47% | 12D    | CTGGGAAGCTTT |
|     | GT <u>CCT</u> ATC---GGAAGCTTTGTACGCAG | 11293 | 43.10% | 2D     | TG           |
|     | GT <u>CCT</u> ATCTTGGGAAGCTTTGTACGCAG | 12248 | 75.17% | 1I     | T            |
| L19 | GT <u>CCT</u> AT-----GTACGCAG         | 2099  | 12.88% | 12D    | CTGGGAAGCTTT |
|     | GT <u>CCT</u> ATC---GGAAGCTTTGTACGCAG | 1665  | 10.22% | 2D     | TG           |
| L20 | GT <u>CCT</u> ATCTTGGGAAGCTTTGTACGCAG | 13550 | 96.58% | 1I     | T            |
| L21 | GT <u>CCT</u> ATCTTGGGAAGCTTTGTACGCAG | 10071 | 97.79% | 1I     | T            |
| L22 | GT <u>CCT</u> ATCTTGGGAAGCTTTGTACGCAG | 8084  | 85.56% | 1I     | T            |
| L23 | GT <u>CCT</u> ATCTTGGGAAGCTTTGTACGCAG | 20220 | 87.32% | 1I     | T            |
| L24 | GT <u>CCT</u> ATC-----TTTGTACGCAG     | 14337 | 47.83% | 8D     | TGGGAAGC     |
|     | GT <u>CCT</u> ATC-----GCTTTGTACGCAG   | 13993 | 46.68% | 6D     | TGGGAA       |
| L25 | GT <u>CCT</u> ATCTTGGGAAGCTTTGTACGCAG | 26563 | 85.38% | 1I     | T            |
| L26 | GT <u>CCT</u> AT-----GTACGCAG         | 14442 | 51.77% | 12D    | CTGGGAAGCTTT |
|     | GT <u>CCT</u> ATC---GGAAGCTTTGTACGCAG | 12552 | 45.00% | 2D     | TG           |
| L27 | GT <u>CCT</u> ATCTTGGGAAGCTTTGTACGCAG | 25825 | 92.07% | 1I     | T            |
| L28 | GT <u>CCT</u> ATCTTGGGAAGCTTTGTACGCAG | 23355 | 93.31% | 1I     | T            |
|     | GT <u>CCT</u> ATCTTGGGAAGCTTTGTACGCAG | 221   | 43.16% | 1I     | T            |
|     | GT <u>CCT</u> ATCTGGGAAGCTTTGTACGCAG  | 140   | 27.34% | WT     |              |
|     | GT <u>CCT</u> ATC-----GCTTTGTACGCAG   | 77    | 15.04% | 6D     | TGGGAA       |
| L29 | GT <u>CCT</u> ATC-----TTTGTACGCAG     | 74    | 14.45% | 8D     | TGGGAAGC     |
|     | GT <u>CCT</u> ATCTTGGGAAGCTTTGTACGCAG | 27513 | 85.43% | 1I     | T            |
| L30 | GT <u>CCT</u> ATCTTGGGAAGCTTTGTACGCAG | 20529 | 90.14% | 1I     | T            |
| L31 | GT <u>CCT</u> ATCTTGGGAAGCTTTGTACGCAG | 19672 | 93.69% | 1I     | T            |
| L32 | GT <u>CCT</u> AT-----GTACGCAG         | 6274  | 51.74% | 12D    | CTGGGAAGCTTT |
|     | GT <u>CCT</u> ATC---GGAAGCTTTGTACGCAG | 5246  | 43.27% | 2D     | TG           |
| L33 | GT <u>CCT</u> ATC-----TTTGTACGCAG     | 9147  | 50.13% | 8D     | TGGGAAGC     |
|     | GT <u>CCT</u> ATC-----GCTTTGTACGCAG   | 8709  | 47.73% | 6D     | TGGGAA       |
| L34 | GT <u>CCT</u> AT-----GTACGCAG         | 12936 | 52.24% | 12D    | CTGGGAAGCTTT |
|     | GT <u>CCT</u> ATC---GGAAGCTTTGTACGCAG | 11159 | 45.06% | 2D     | TG           |
| L35 | GT <u>CCT</u> AT-----GTACGCAG         | 8962  | 52.69% | 12D    | CTGGGAAGCTTT |
|     | GT <u>CCT</u> ATC---GGAAGCTTTGTACGCAG | 7243  | 42.59% | 2D     | TG           |
| L36 | GT <u>CCT</u> ATCTTGGGAAGCTTTGTACGCAG | 28092 | 80.70% | 1I     | T            |
|     | GT <u>CCT</u> ATCTTGGGAAGCTTTGTACGCAG | 2154  | 6.19%  | 1I,SNP | T,A->G       |
|     | GT <u>CCT</u> AT-----GTACGCAG         | 11409 | 46.01% | 12D    | CTGGGAAGCTTT |
| L37 | GT <u>CCT</u> ATC---GGAAGCTTTGTACGCAG | 8189  | 33.03% | 2D     | TG           |
|     | GT <u>CCT</u> ATCTTGGGAAGCTTTGTACGCAG | 5029  | 20.28% | 1I     | T            |
| L38 | GT <u>CCT</u> ATCTGGGAAGCTTTGTACGCAG  | 23432 | 90.57% | WT     |              |
| L39 | GT <u>CCT</u> ATCTTGGGAAGCTTTGTACGCAG | 21323 | 89.51% | 1I     | T            |
| L40 | GT <u>CCT</u> ATC-----GCTTTGTACGCAG   | 9595  | 50.00% | 6D     | TGGGAA       |
|     | GT <u>CCT</u> ATC-----TTTGTACGCAG     | 9308  | 48.50% | 8D     | TGGGAAGC     |
| L41 | GT <u>CCT</u> ATCTTGGGAAGCTTTGTACGCAG | 24741 | 85.13% | 1I     | T            |
| L42 | GT <u>CCT</u> ATC---GGAAGCTTTGTACGCAG | 10392 | 49.40% | 1D     | T            |

|     |                                               |       |        |     |              |
|-----|-----------------------------------------------|-------|--------|-----|--------------|
|     | GT <u>CCT</u> ATCT <u>TGGGAAGCTTTGTACGCAG</u> | 10150 | 48.25% | 1I  | T            |
| L44 | GT <u>CCT</u> ATCTGGGAAGCTTTGTACGCAG          | 18162 | 91.12% | SNP | T->A         |
|     | GT <u>CCT</u> ATCT <u>TGGGAAGCTTTGTACGCAG</u> | 281   | 49.13% | 1I  | T            |
|     | GT <u>CCT</u> ATCTGGGAAGCTTTGTACGCAG          | 135   | 23.60% | WT  |              |
| L45 | GT <u>CCT</u> ATC---GGAAGCTTTGTACGCAG         | 78    | 13.64% | 2D  | TG           |
|     | GT <u>CCT</u> AT-----GTACGCAG                 | 78    | 13.64% | 12D | CTGGGAAGCTTT |
|     | GT <u>CCT</u> ATCT <u>TGGGAAGCTTTGTACGCAG</u> | 144   | 53.33% | 1I  | T            |
| L46 | GT <u>CCT</u> ATCTGGGAAGCTTTGTACGCAG          | 126   | 46.67% | WT  |              |
|     | GT <u>CCT</u> ATCT <u>TGGGAAGCTTTGTACGCAG</u> | 373   | 53.52% | 1I  | T            |
| L47 | GT <u>CCT</u> ATCTGGGAAGCTTTGTACGCAG          | 324   | 46.48% | WT  |              |
| L48 | GT <u>CCT</u> ATCTGGGAAGCTTTGTACGCAG          | 11013 | 98.55% | WT  |              |

Note: The yellow areas are the PAM areas, the underlines represent the target sequences; The red bases represent the inserted bases, -- represent the deleted bases, Lowercase letters stand for substitution bases; I: insertion, D: deletion, SNP:substitution, WT: wild type.
